# Supplementary material for: Indentation and Detachment in Adhesive Contacts between Soft Elastomer and Rigid Indenter at Simultaneous Motion in Normal and Tangential Direction: Experiments and Simulations
Source: MDPI journal article supplement (doi:10.3390/biomimetics8060477), 2023-10-07
Supplement: s1 [file s1]

# Supplementary materials

## Indentation and detachment in adhesive contacts between soft elastomer and rigid indenter at simultaneous motion in normal and tangential direction: experiments and simulations

Iakov A. Lyashenko <sup>1,2,\*</sup>, Valentin L. Popov <sup>1</sup>, and Vadym Borysiuk <sup>1,3</sup>

<sup>1</sup> Department of System Dynamics and Friction Physics, Institute of Mechanics, Technische Universität Berlin, 10623 Berlin, Germany; v.popov@tu-berlin.de (V.L.P.); v.borysiuk@campus.tu-berlin.de (V.B.)

<sup>2</sup> Department of Applied Mathematics and Complex Systems Modeling, Faculty of Electronics and Information Technology, Sumy State University, 40007 Sumy, Ukraine

<sup>3</sup> Department of Nanoelectronics and Surface Modification, Faculty of Electronics and Information Technology, Sumy State University, 40007 Sumy, Ukraine

\* Correspondence: i.lyashenko@tu-berlin.de; Tel.: +49-(0)30-314-75917

### Contents:

**Figure S1** Dependencies similar to Figure 3 in the article but obtained for an indenter with a radius  $R = 100$  mm (normal contact).

**Figure S2** Dependencies similar to Figure 4 in the article but obtained for an indenter with a radius  $R = 100$  mm (tangential contact).

**Figure S3** Dependencies similar to Figure 5 in the article but obtained for an indenter with a radius  $R = 100$  mm (indentation according to scenario (A), schematics of the experiment is shown in Figure 2 in the main article).

**Figure S4** Dependencies similar to Figure 6 in the article but obtained for an indenter with a radius  $R = 100$  mm (indentation according to scenario (B), schematics of the experiment is shown in Figure 2 in the main article).

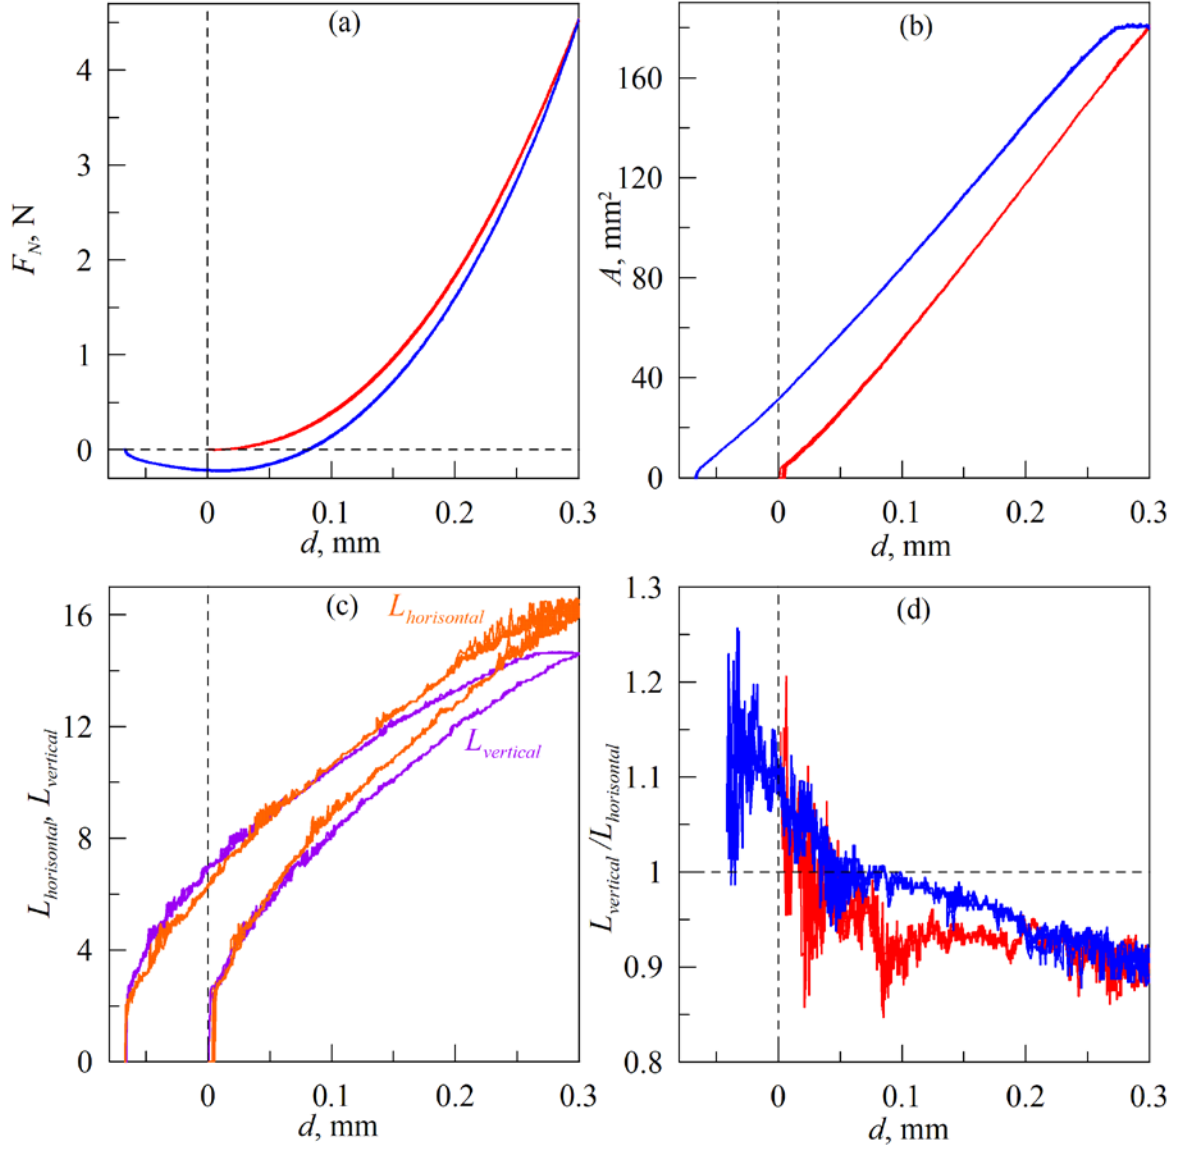

**Figure S1.** Dependencies of a normal force  $F_N$  (a), contact area  $A$  (b), size of the contact in vertical  $L_{vertical}$  and horizontal  $L_{horizontal}$  directions (c) and ratio  $L_{vertical}/L_{horizontal}$  (d) on indentation depth  $d$ . Radius of a steel indenter  $R = 100$  mm, elastomer thickness (TARNAC CRG N3005)  $h = 5$  mm. Supplementary Video S5 is also available (presented data is similar to dependencies obtained with indenter  $R = 30$  mm that are shown in Figure 3 in main article).

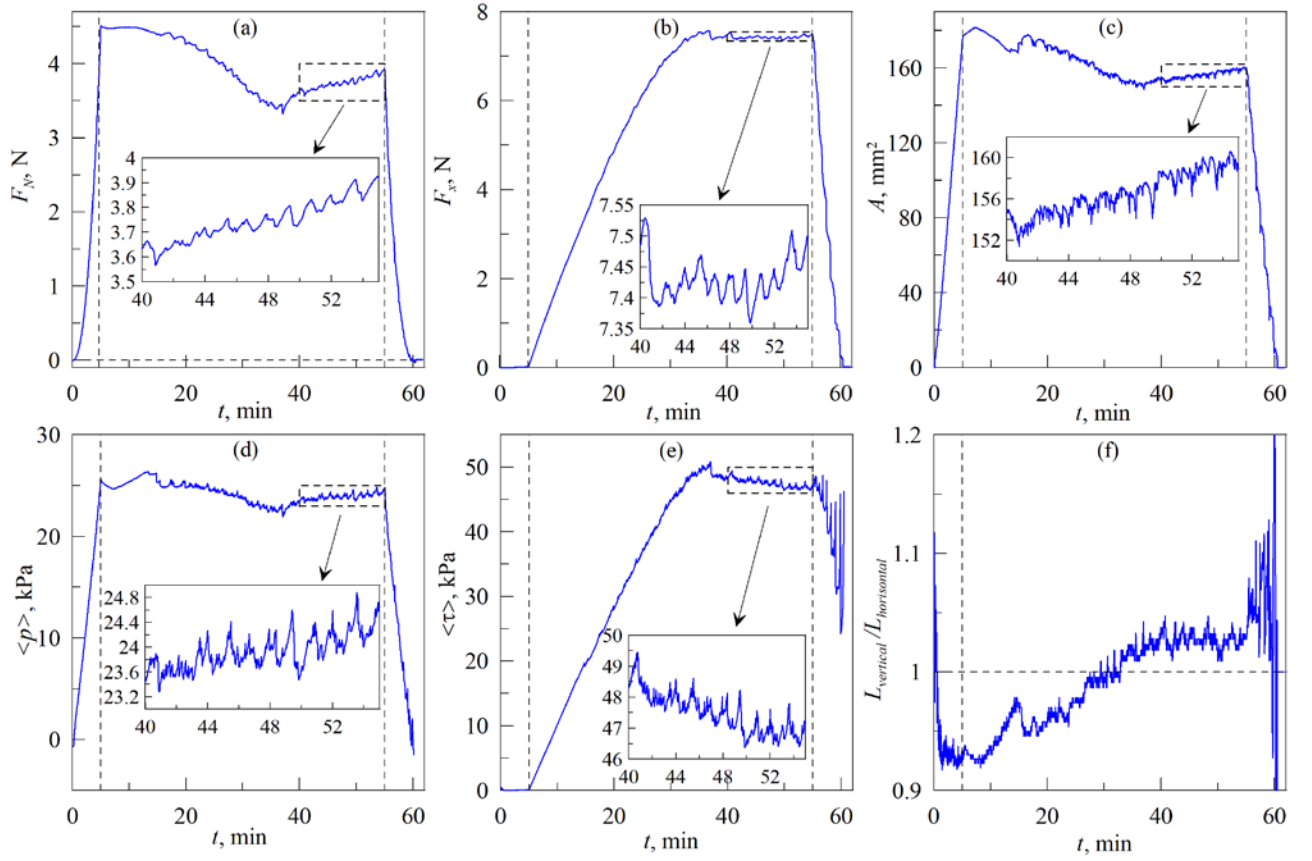

**Figure S2.** Time dependencies of the normal  $F_N$  (a) and tangential  $F_x$  (b) forces, contact area  $A$  (c), average contact pressure  $\langle p \rangle$  (d), averaged tangential stresses  $\langle \tau \rangle$  (e) and ratio  $L_{\text{vertical}}/L_{\text{horizontal}}$  (f). Radius of the indenter  $R = 100$  mm, elastomer thickness (TARNAC CRG N3005)  $h = 5$  mm, indentation depth during tangential shift  $d_{\text{max}} = 0.3$  mm, velocity of the indenter motion  $v = 1 \mu\text{m/s}$ . Supplementary Video S6 is also available (presented data is similar to dependencies obtained with indenter  $R = 30$  mm that are shown in Figure 4 in main article).

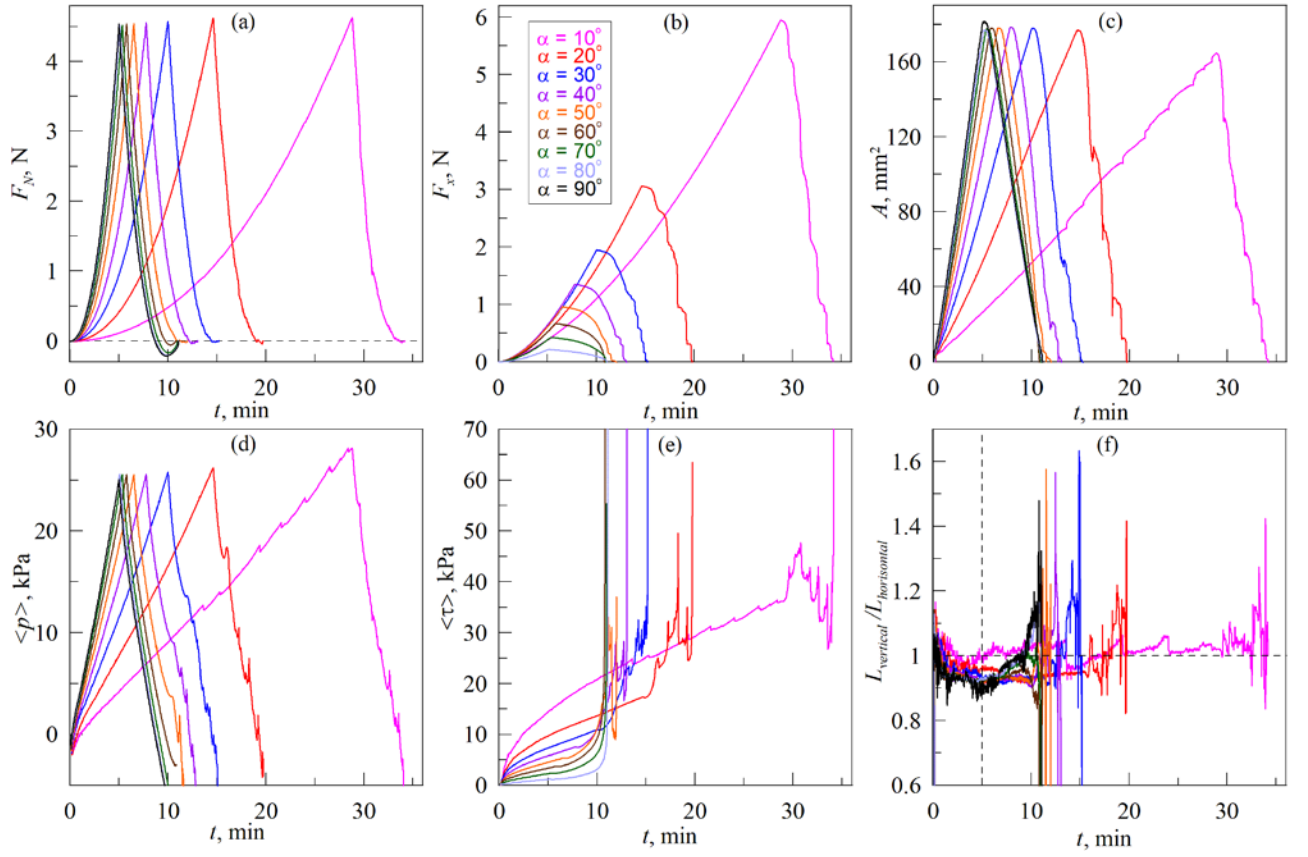

**Figure S3.** Time dependencies of the normal  $F_N$  (a) and tangential  $F_x$  (b) forces, contact areas  $A$  (c), average contact pressures  $\langle p \rangle$  (d), tangential stresses  $\langle \tau \rangle$  (e) and ratios  $L_{\text{vertical}}/L_{\text{horizontal}}$  (f). Radius of the indenter  $R = 100$  mm, elastomer thickness (TARNAC CRG N3005)  $h = 5$  mm, maximal indentation depth  $d_{\text{max}} = 0.3$  mm, in the experiment according to scenario (A). Supplementary Video S7 is also available (presented data is similar to dependencies obtained with indenter  $R = 30$  mm that are shown in Figure 5 in main article).

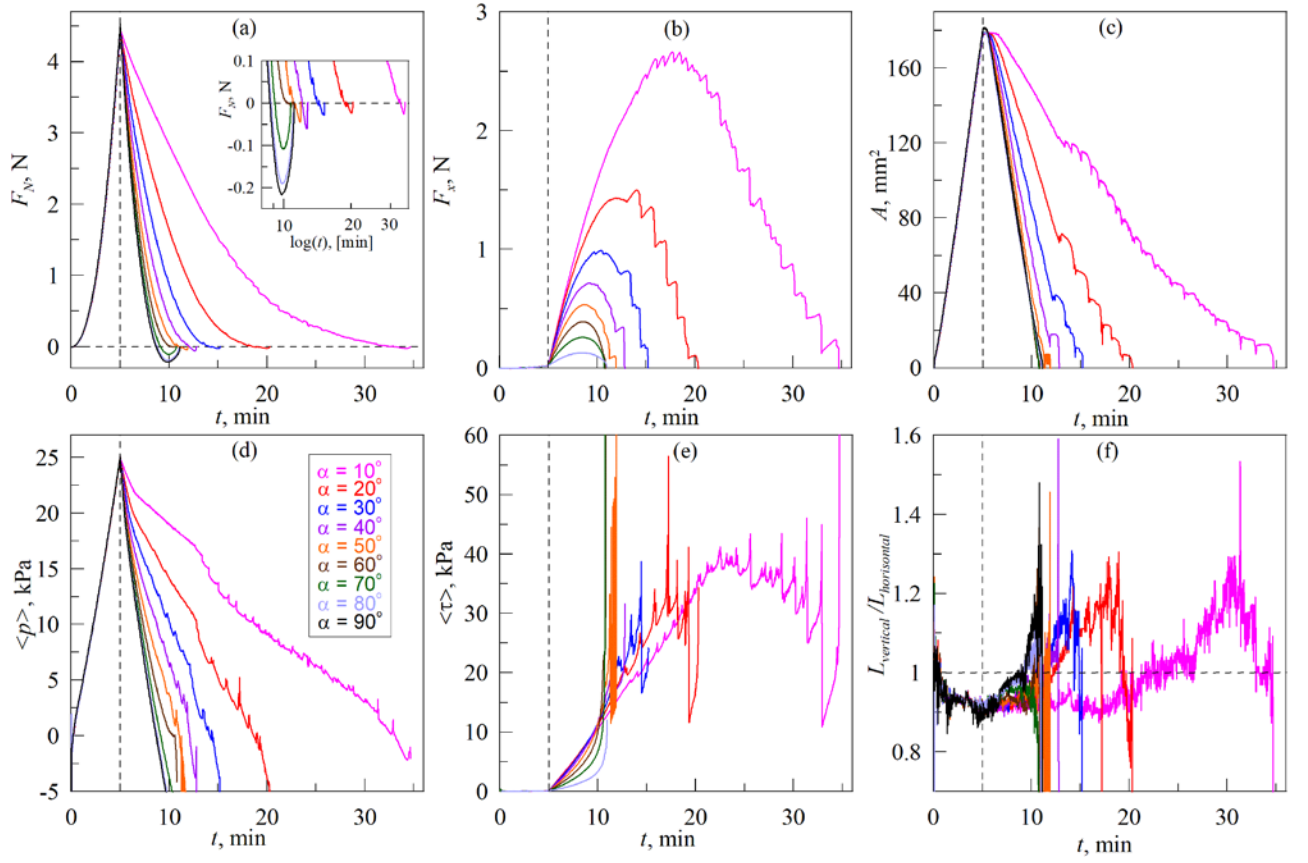

**Figure S4.** Time dependencies of the normal  $F_N$  (a) and tangential  $F_x$  (b) forces, contact areas  $A$  (c), average contact pressures  $\langle p \rangle$  (d), tangential stresses  $\tau$  (e) and ratios  $L_{\text{vertical}}/L_{\text{horizontal}}$  (f). Radius of the indenter  $R = 100$  mm, elastomer thickness (TARNAC CRG N3005)  $h = 5$  mm, maximal indentation depth  $d_{\text{max}} = 0.3$  mm, in the experiment according to scenario (B). Supplementary Video S8 is also available (presented data is similar to dependencies obtained with indenter  $R = 30$  mm that are shown in Figure 6 in main article).
